# Supplementary material for: Identification of genetic elements in metabolism by high-throughput mouse phenotyping
Source: PubMed Central journal article supplement (PMC5773596; doi:10.1038/s41467-017-01995-2), 2018-01-18
Supplement: 41467_2017_1995_MOESM10_ESM.pdf [file 41467_2017_1995_MOESM10_ESM.pdf]

Glycan Biosynthesis and Metabolism

Nucleotide Metabolism

Metabolism of Cofactors and Vitamins

Biosynthesis of Other Secondary Metabolites

Lipid Metabolism

Carbohydrate Metabolism

Amino Acid Metabolism

Energy Metabolism

Metabolism of Other Amino Acid

Metabolism of Terpenoids and Polyketides

Xenobiotics Biodegradation and Metabolism

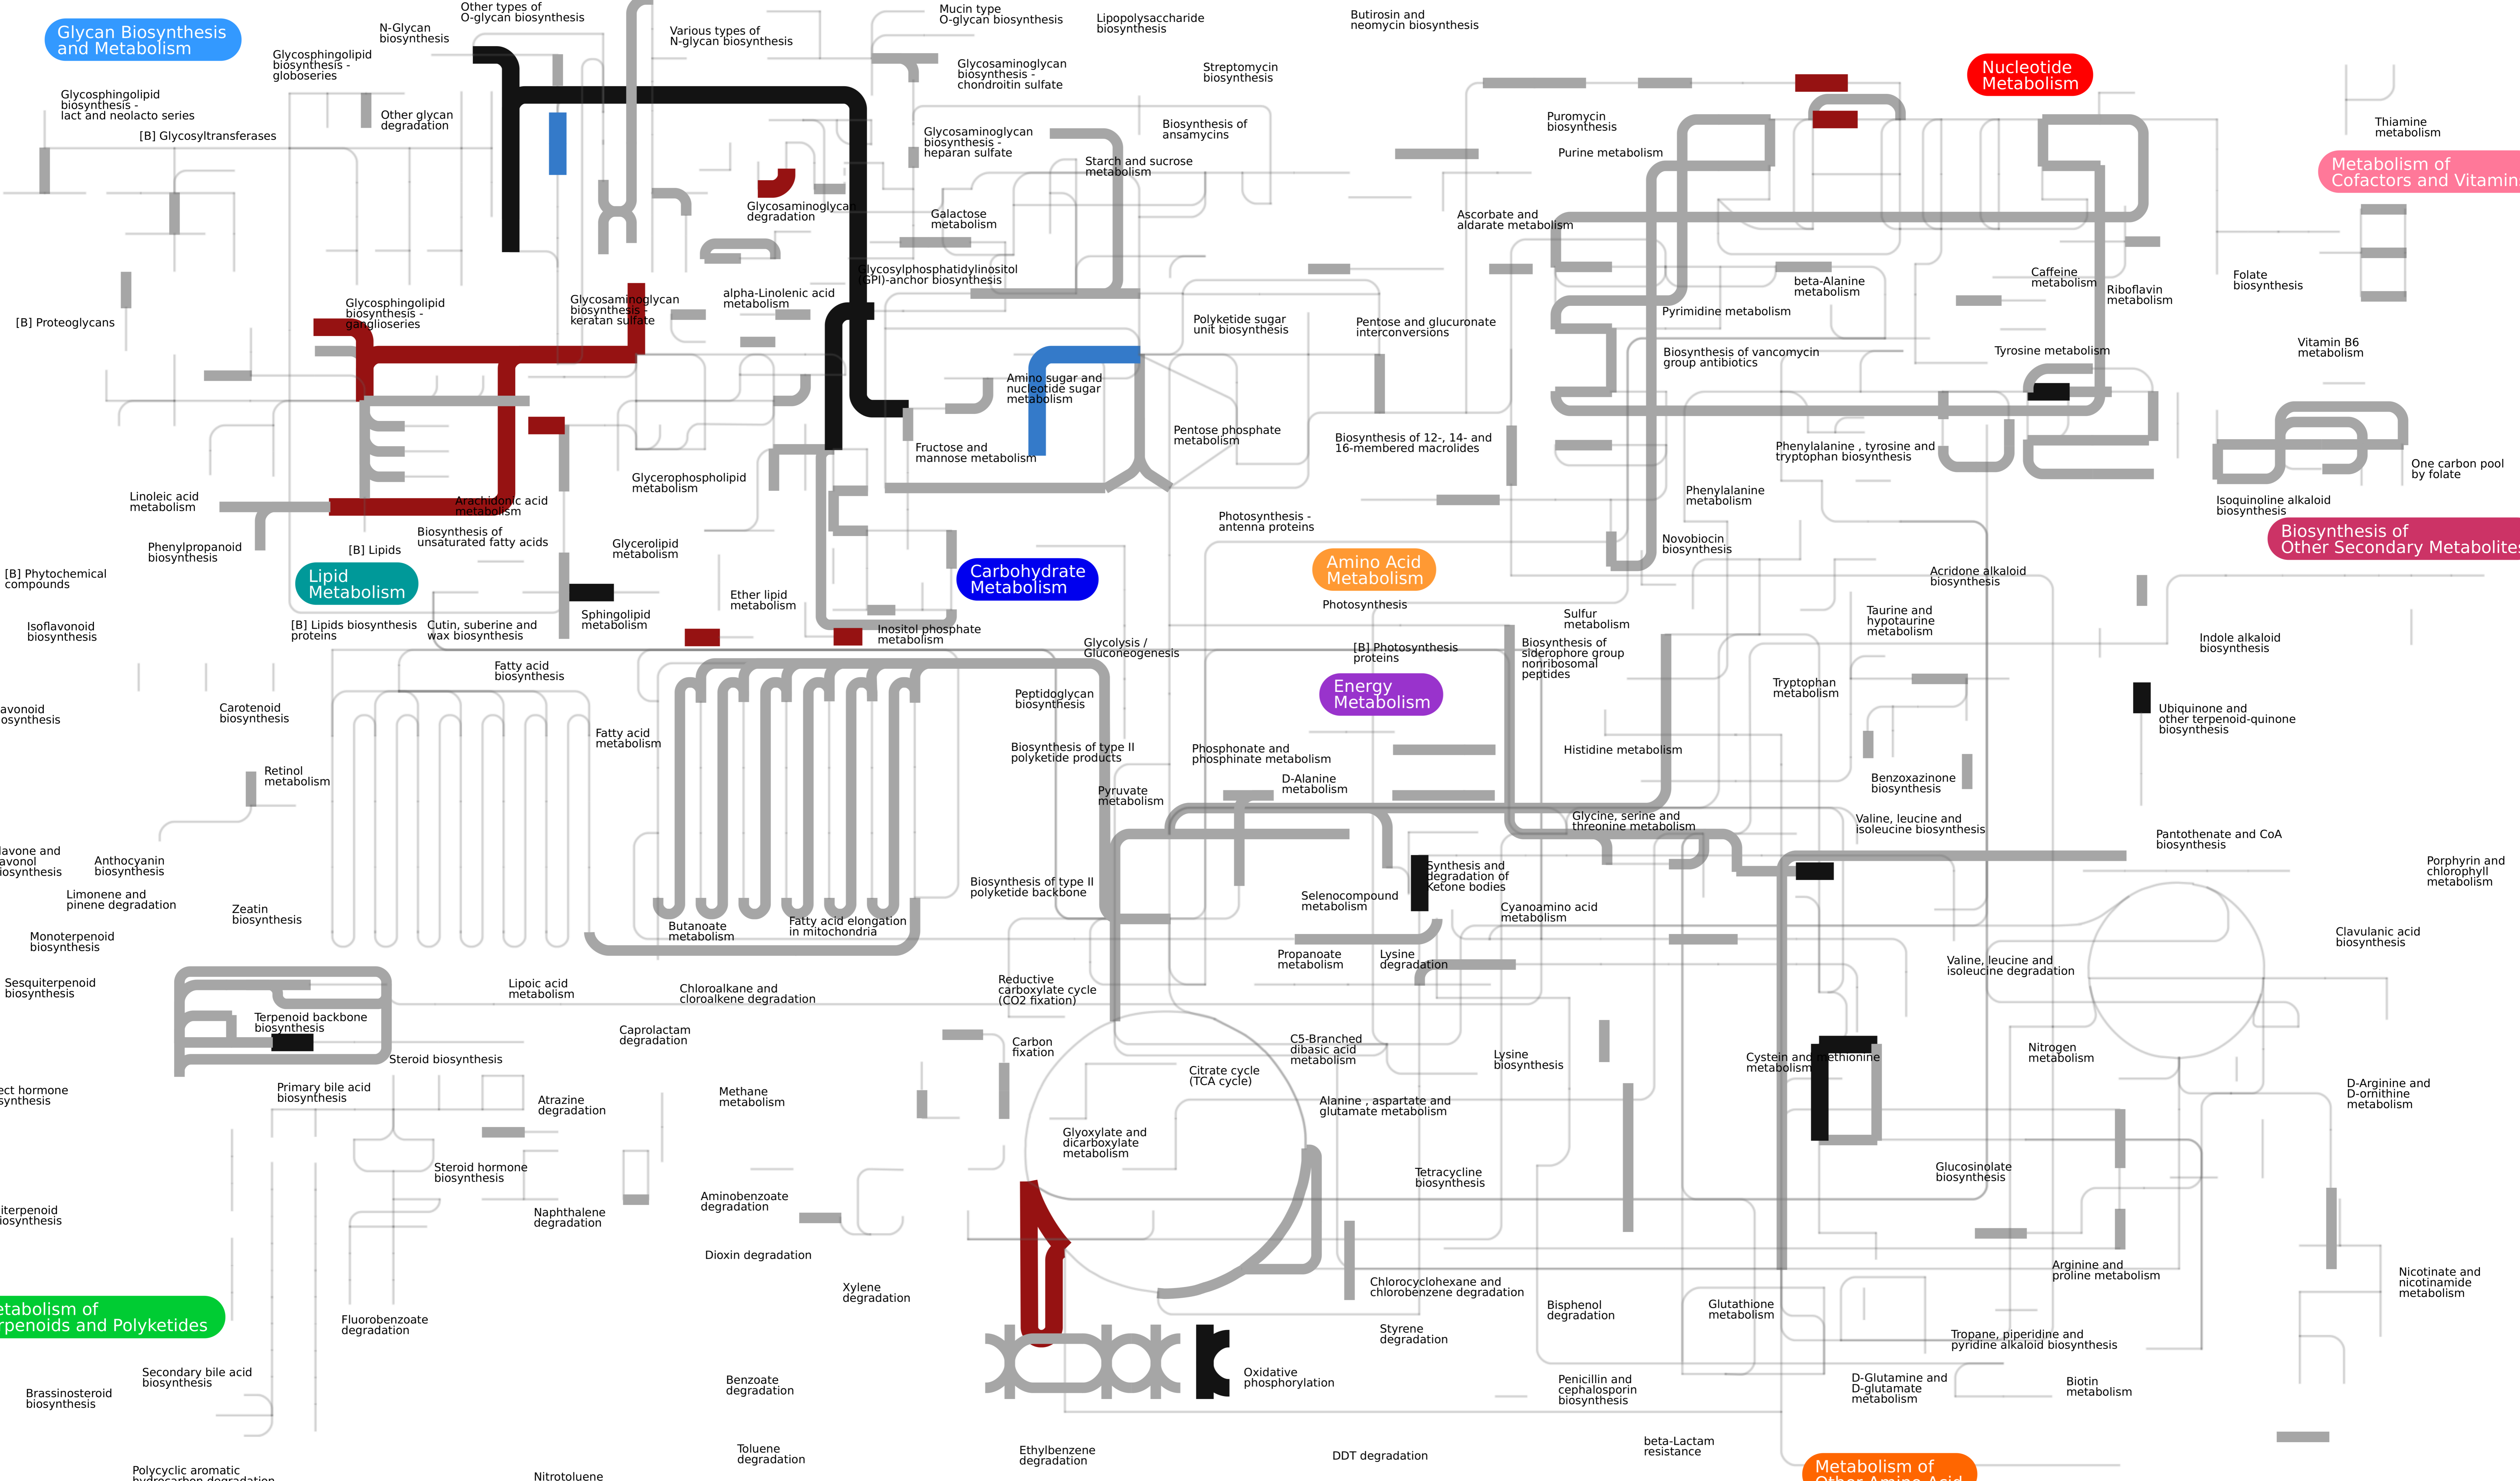

Metabolism of xenobiotics by cytochrom P450    Drug metabolism - cytochrom P450    Drug metabolism - other enzymes
