# Supplementary material for: Identification of genetic elements in metabolism by high-throughput mouse phenotyping
Source: PubMed Central journal article supplement (PMC5773596; doi:10.1038/s41467-017-01995-2), 2018-01-18
Supplement: 41467_2017_1995_MOESM12_ESM.pdf [file 41467_2017_1995_MOESM12_ESM.pdf]

Glycan Biosynthesis and Metabolism

Nucleotide Metabolism

Metabolism of Cofactors and Vitamins

Biosynthesis of Other Secondary Metabolites

Lipid Metabolism

Carbohydrate Metabolism

Amino Acid Metabolism

Energy Metabolism

Metabolism of Other Amino Acid

Metabolism of Terpenoids and Polyketides

Xenobiotics Biodegradation and Metabolism

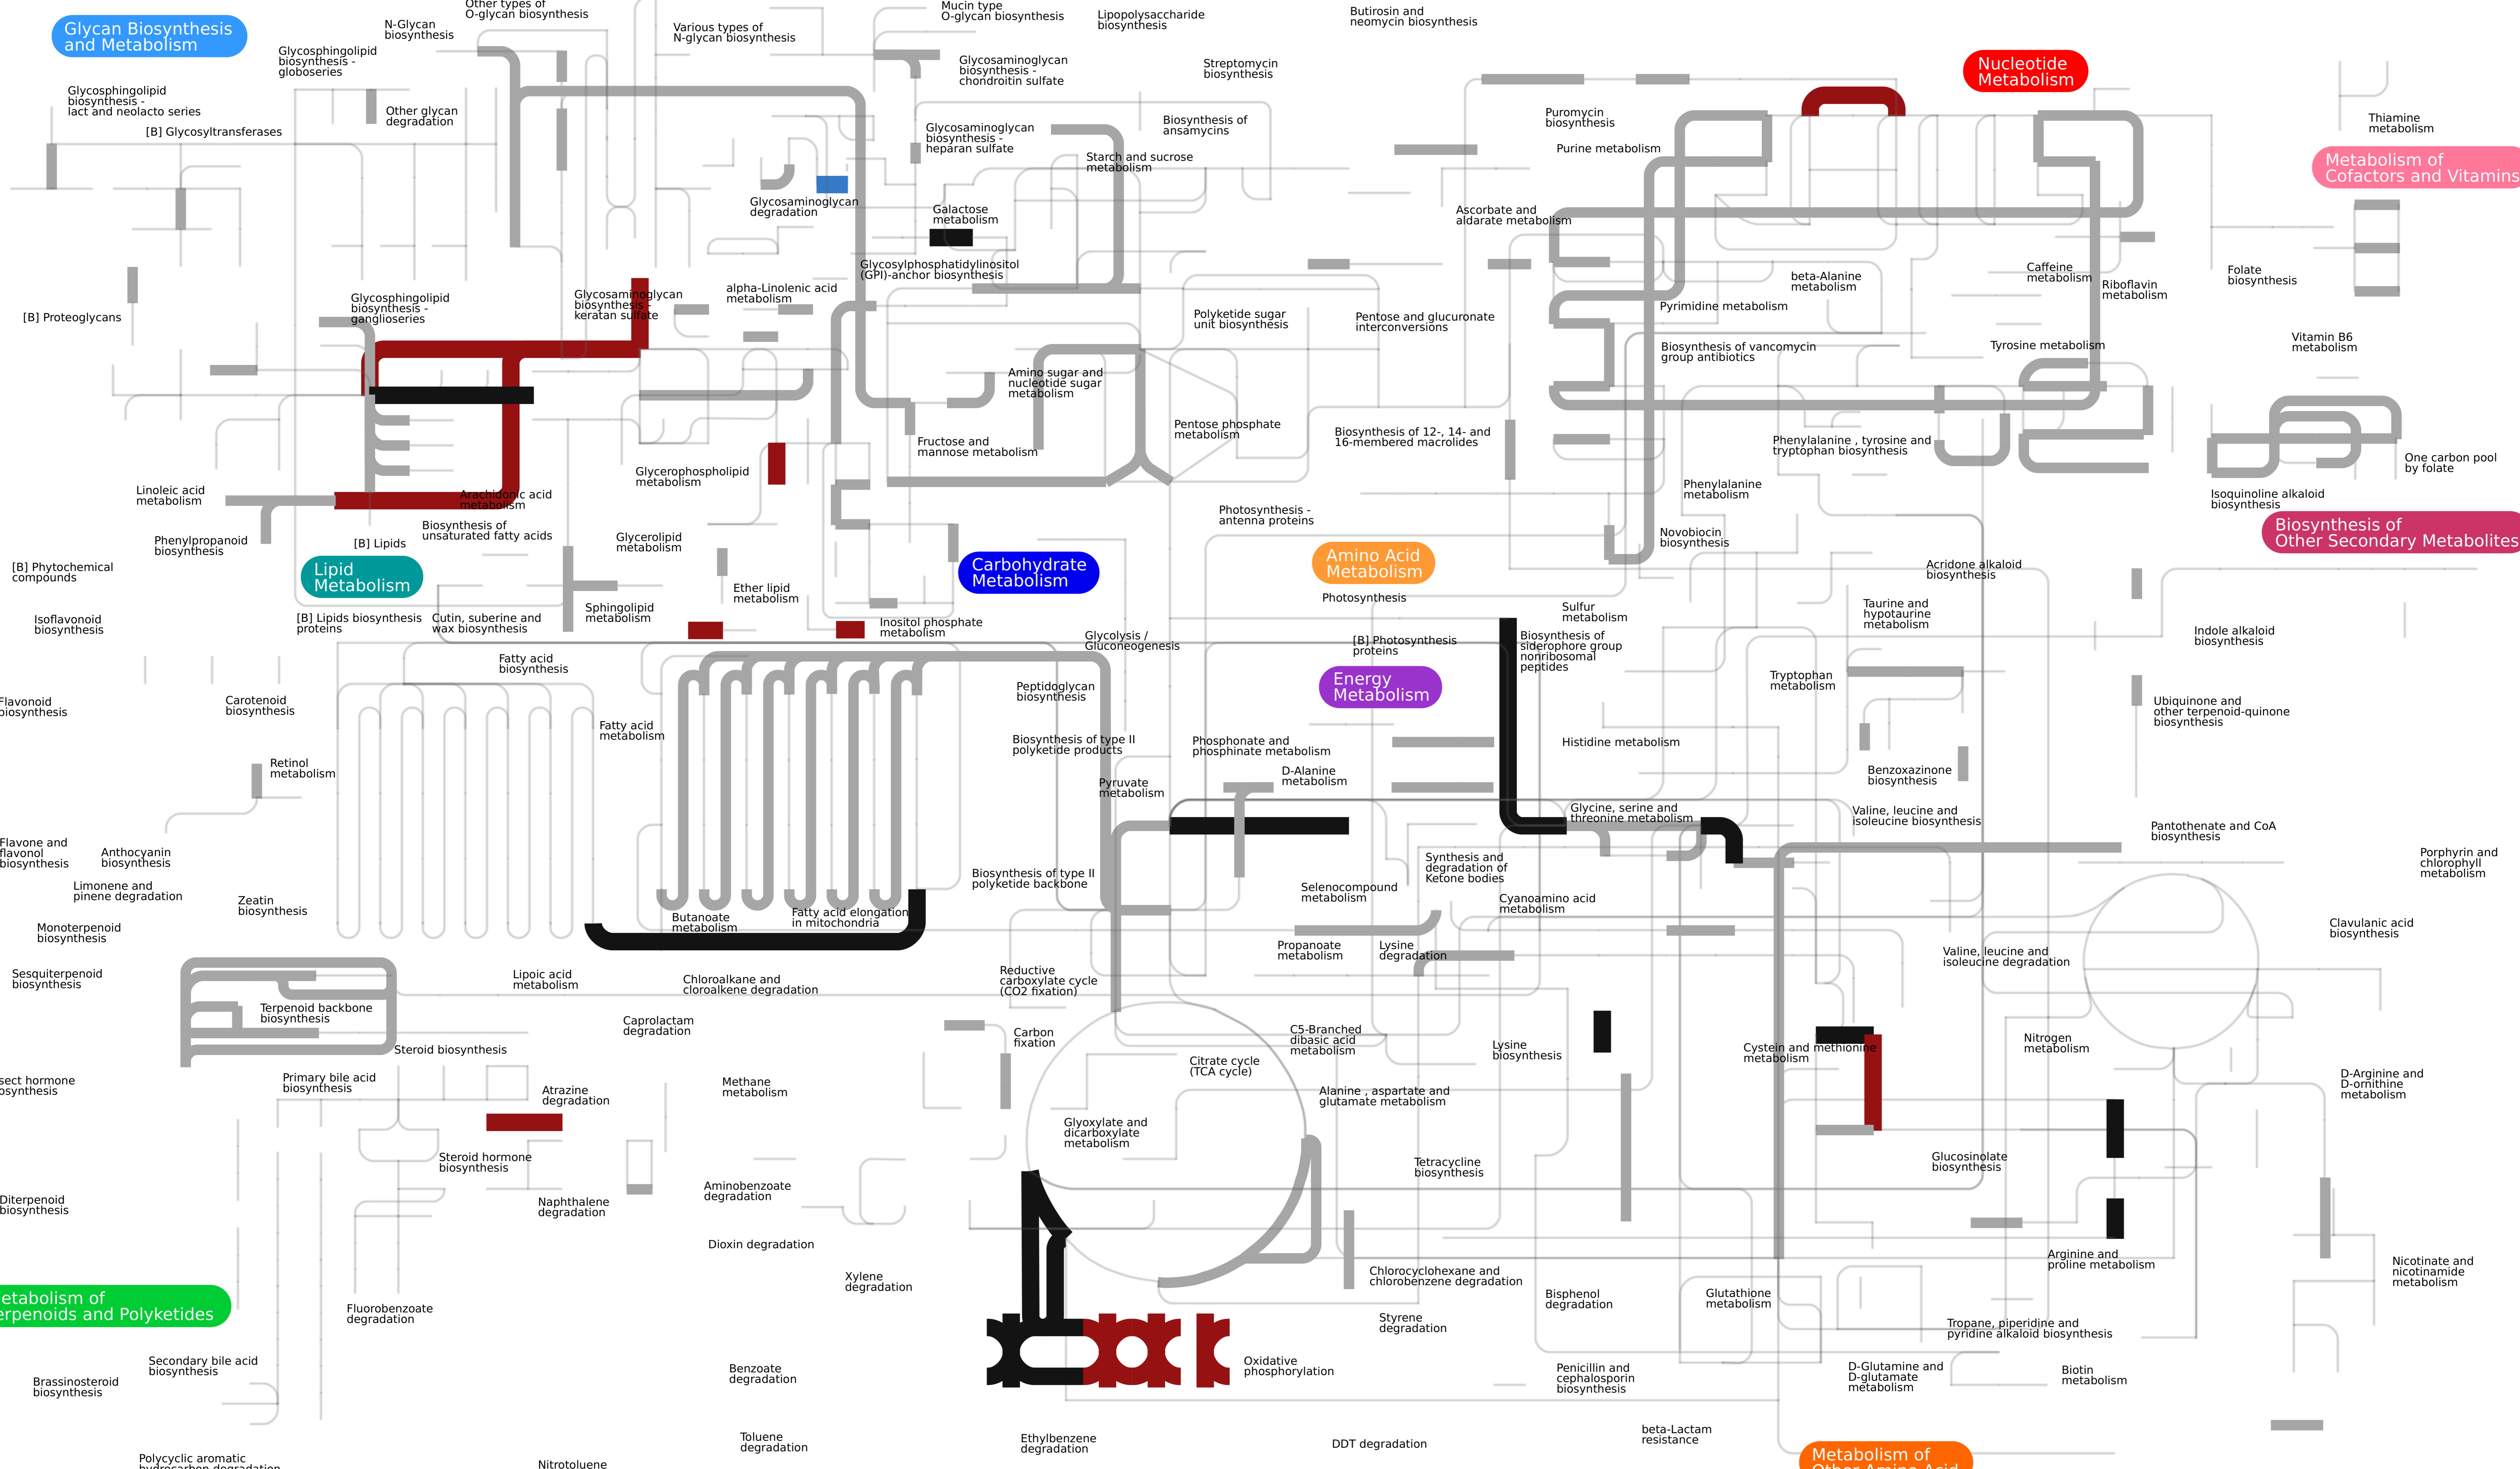

[B] Cytochrome P450 Polycyclic aromatic hydrocarbon degradation Nitrotoluene degradation  
 Metabolism of xenobiotics by cytochrom P450 Drug metabolism - cytochrom P450 Drug metabolism - other enzymes
