# Supplementary material for: Identification of genetic elements in metabolism by high-throughput mouse phenotyping
Source: PubMed Central journal article supplement (PMC5773596; doi:10.1038/s41467-017-01995-2), 2018-01-18
Supplement: 41467_2017_1995_MOESM13_ESM.pdf [file 41467_2017_1995_MOESM13_ESM.pdf]

Glycan Biosynthesis and Metabolism

Nucleotide Metabolism

Metabolism of Cofactors and Vitamins

Carbohydrate Metabolism

Lipid Metabolism

Amino Acid Metabolism

Energy Metabolism

Biosynthesis of Other Secondary Metabolites

Metabolism of Other Amino Acid

Metabolism of Terpenoids and Polyketides

Xenobiotics Biodegradation and Metabolism

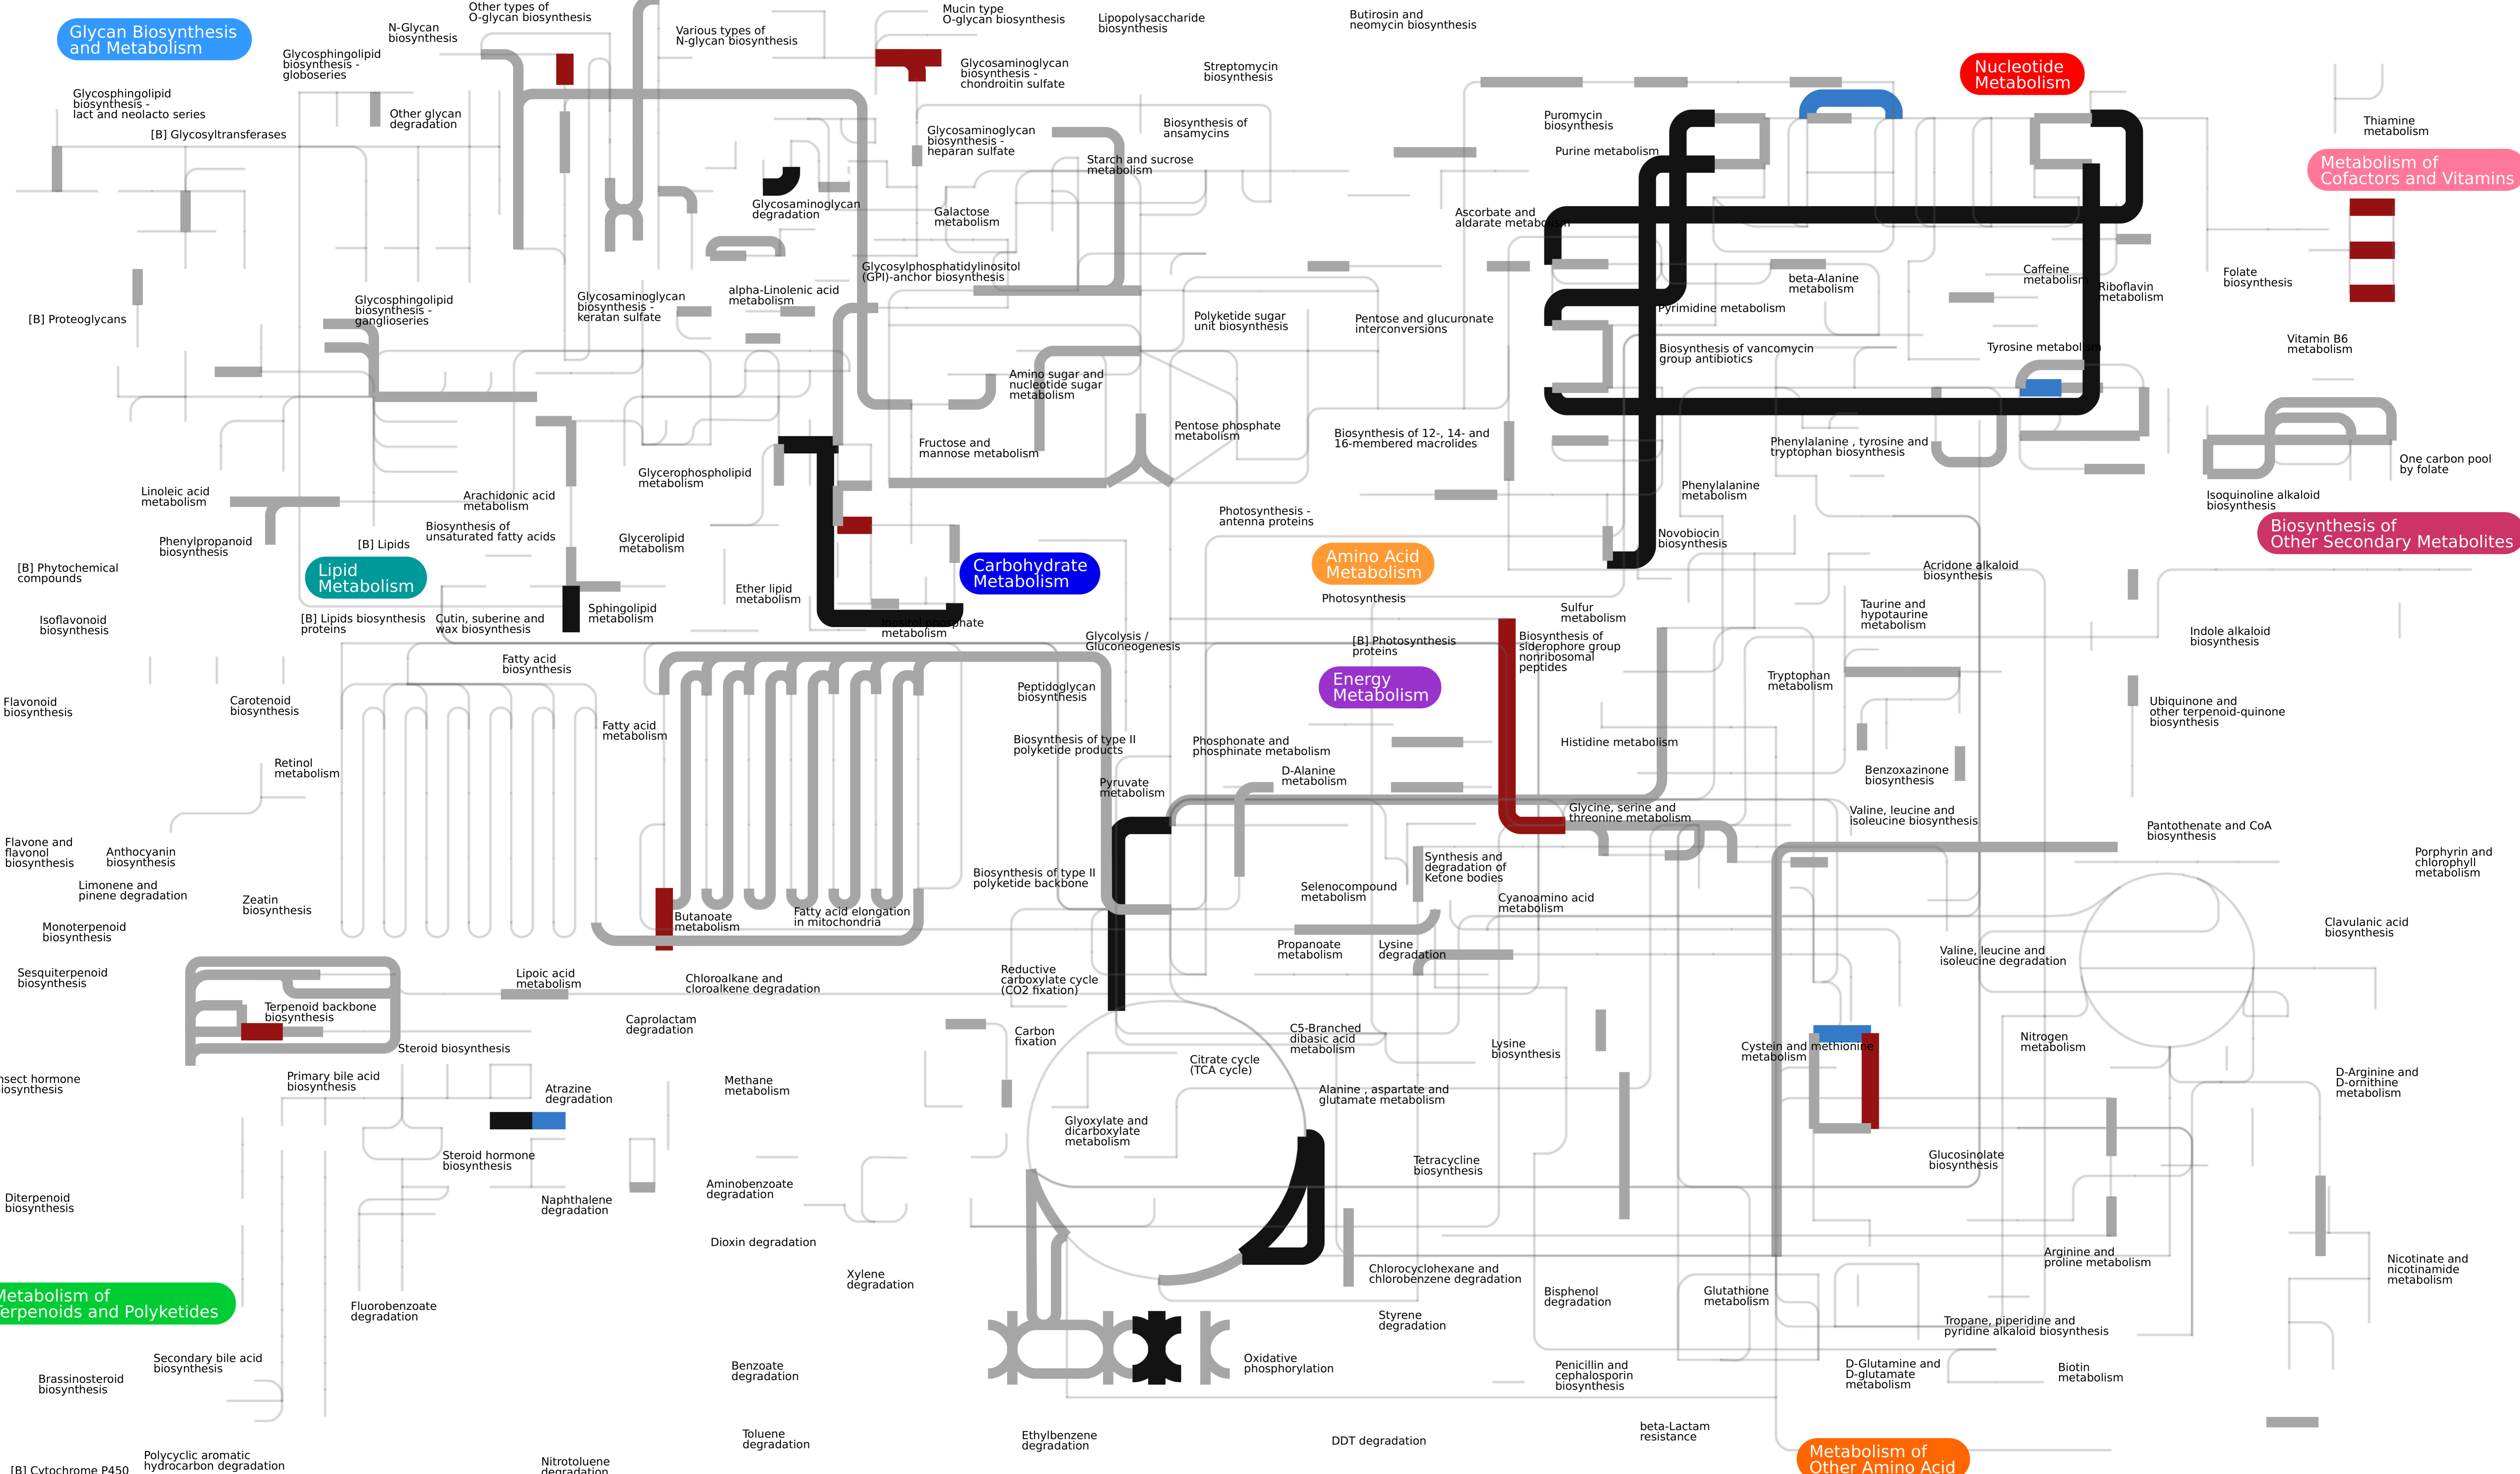

[B] Cytochrome P450    Polycyclic aromatic hydrocarbon degradation    Nitrotoxicant degradation    Metabolism of xenobiotics by cytochrom P450    Drug metabolism - cytochrom P450    Drug metabolism - other enzymes
